# Supplementary material for: An adjustable acoustic metamaterial cell using a magnetic membrane for tunable resonance
Source: PubMed Central journal article supplement (PMC11637203; doi:10.1038/s41598-024-65819-2), 2024-07-01
Supplement: 41598_2024_65819_MOESM1_ESM.pdf [file 41598_2024_65819_MOESM1_ESM.pdf]

# Supplementary Information - An adjustable acoustic metamaterial cell using a magnetic membrane for tuneable resonance

Alicia Gardiner<sup>1,2,\*</sup>, Roger Domingo-Roca<sup>2</sup>, James F. C. Windmill<sup>2</sup>, and Andrew Feeney<sup>1</sup>

<sup>1</sup>Centre for Medical and Industrial Ultrasonics, James Watt School of Engineering, University of Glasgow, Glasgow, G12 8QQ, UK

<sup>2</sup>Centre for Ultrasonic Engineering, Department of Electronic & Electrical Engineering, University of Strathclyde, Glasgow, G1 1XW, UK

\*a.gardiner.1@research.gla.ac.uk

## Mathematical determination of membrane tension and Young's modulus

The tension on the membrane without an applied magnetic field was determined using **Equation S1**<sup>1</sup>.

$$T = \left( \frac{2\pi fR}{2.405} \right)^2 \quad (\text{S1})$$

$f$  is the resonance frequency of the membrane (determined experimentally),  $R$  is the radius of the membrane, and 2.405 is the first root of the Bessel function of order 0.

The Young's modulus,  $E$ , of the membrane was determined using the data recorded with Polytec's MSA-100-3D Micro System Analyzer. A method for determining  $E$  of a clamped membrane via its mechanical resonance frequency has been detailed in the literature<sup>2</sup>. This method exploits the effects of thermoelastic bending on the modulus with the following equation.

$$E = 48\pi^2(1 - \nu^2)\rho_m \left( \frac{f}{h} \right)^2 \left( \frac{R}{\lambda_n} \right)^4 \quad (\text{S2})$$

where  $\nu$  is the Poisson's ratio of the membrane,  $\rho_m$  is the density of the membrane, and  $\lambda_n$  is 3,196. To find a comparison for the resin's mechanical qualities,  $E$  and  $\nu$ , the closest equivalents in the literature are related to dental composites. This is because they are often photo-curable and generally contain ceramic inclusions that approximately replicate the size and shape of the magnetic nanoparticles. A study reporting composite biomaterials<sup>3</sup>, measured the mechanical properties of bisphenol-A ethoxylate diacrylate with varying percent weights of triethylene glycol dimethacrylate to be 4.3-4.5 GPa, and  $\nu$  to be 0.334-0.352. Other studies have measured  $E$  values of a resin comprising of only crosslinking ethoxylated bisphenol-A dimethacrylates (without composites or other secondary monomers) as 2.16 MPa<sup>4</sup> and 1.134 MPa<sup>5</sup>. Another paper found  $\nu$  of several different dental fillers with various combinations of monomers and composites (primarily comprised of crosslinking methacrylate/dimethacrylates) to all be within 0.3-0.39<sup>6</sup>.

The disparity between values for  $E$  is due to the different average molecular weights of BEMA used, along with the different additives, inhibitors, and composites used in these resin variations.  $\nu$  is more consistent regardless of variations in resin formulation, as such, an informed estimate of  $\nu$  can be used to inform the mathematical model. A membrane clamp that replicates the mechanical pre-stress applied by the device was fabricated and assembled with an identical membrane to that used in the experimental data collection. The membrane's resonant properties were measured using a Micro System Analyzer (MSA-100-3D, Polytech, GmbH), with a layer of foam underneath to closely mimic free boundary conditions (**Supplementary Figure S1**). A full scan of the membrane's surface was conducted with a frequency resolution of 0.3125 Hz.

## DAQ parameters and data post-processing

The DAQ parameters for generating the input signal and recording the output signal are as follows: sampling frequency is 25,000 points per second, the AC input voltage is 3 V, start chirp frequency is 50 Hz, end chirp frequency is 150 Hz, total run-time per pass is 300 seconds, and total number of data points per pass is 7,500,000. Several passes were recorded to build up a robust data set, so the total number of data points is a product of the number of points per pass and the number of magnetic testing conditions (see **Supplementary Table S3**).

The obtained acoustic recordings were processed in MATLAB using the following steps:

- Load system variables and data sets.
- Remove the effect of the microphone amplifier by setting each recording's baseline to zero.
- Use 'periodogram' with a rectangular window size of the dataset to convert the signal to the frequency domain and find the power spectra of each recording.
- Identify the peak power and find the corresponding resonance frequency.
- Compare recordings by plotting the power (dB) against the frequency bandwidth (Hz).

## Supplementary Table S1 - Definitions

| Definitions and Values used in the Mathematical Model                      |                |                         |          |
|----------------------------------------------------------------------------|----------------|-------------------------|----------|
| Variable                                                                   | Symbol         | Value                   | Units    |
| Density of Air                                                             | $\rho_{air}$   | 1.293 <sup>7</sup>      | $Kg/m^3$ |
| Speed of Sound in Air                                                      | $c_{air}$      | 344 <sup>8</sup>        | $m/s$    |
| Height of Helmholtz Resonator Neck                                         | $h_{neck}$     | $2.5 \times 10^{-3}$    | $m$      |
| Area of Neck Opening                                                       | $S_{neck}$     | $3.1416 \times 10^{-4}$ | $m$      |
| Volume of HR Cavity                                                        | $V_{cavity}$   | $1.3273 \times 10^{-5}$ | $m^3$    |
| Density of Membrane                                                        | $\rho_{mem}$   | 1185.23                 | $Kg/m^3$ |
| Thickness of Membrane                                                      | $h$            | $2.6 \times 10^{-4}$    | $m$      |
| Nth solution to the Bessel function of the 1st kind, 0th order ( $n = 1$ ) | $\mu_n$        | 2.405 <sup>1</sup>      | -        |
| Membrane Radius                                                            | a              | $13 \times 10^{-3}$     | $m$      |
| Fundamental/Natural Frequency of Membrane                                  | $\omega_{mem}$ | -                       | $Rads/s$ |
| Damping Ratio of Membrane                                                  | $\zeta_n$      | 0.005                   | -        |
| Viscous Damping Coefficient                                                | $c_d$          | -                       | $Ns/m$   |
| Volume Velocity of HR air at Neck                                          | $U_1$          | -                       | $m^3/s$  |
| Volume Velocity of air around Membrane for 1st mode                        | $U_2$          | -                       | $m^3/s$  |
| Normal Displacement of Membrane                                            | z              | -                       | $m$      |
| Time Elapsed                                                               | t              | -                       | s        |
| Pressure of Acoustic Excitation                                            | $P_1$          | 0                       | N        |
| Frequency of Excitation                                                    | $\omega_F$     | -                       | $Rads/s$ |
| Acoustic Fundamental Resonant Frequency of Device                          | $\omega$       | -                       | $Rads/s$ |
| Flexural Stiffness of membrane                                             | D              | -                       | Nm       |
| Tension per unit Length                                                    | T              | -                       | N/m      |
| Mechanical Pre-stress                                                      | $T_1$          | -                       | N/m      |

| Definitions and Values used in the Mathematical Model        |         |                        |         |
|--------------------------------------------------------------|---------|------------------------|---------|
| Variable                                                     | Symbol  | Value                  | Units   |
| Magnetic Pre-stress                                          | $T_2$   | -                      | $N/m$   |
| Young's Modulus of Membrane                                  | $E$     | $17.89 \times 10^6$    | $N/m^2$ |
| Poisson's Ratio of Membrane                                  | $\nu$   | 0.35                   | -       |
| Magnetisation of Saturation per unit Volume                  | $M$     | $2.8446 \times 10^3$   | $A/m^2$ |
| Applied Magnetic Field Strength                              | $H$     | -                      | $A/m$   |
| Vacuum Permeability                                          | $\mu_0$ | $4\pi \times 10^{-79}$ | $N/A^2$ |
| Magnetic body Force on Membrane (Normal force per unit area) | $P_0$   | -                      | $N/m^2$ |

### Supplementary Table S2 - Magnetic Sample Specifications

| Custom Resin Samples (100-50nm Fe <sub>3</sub> O <sub>4</sub> , 3.5%wt) |                      |                  |                 |
|-------------------------------------------------------------------------|----------------------|------------------|-----------------|
| Poling Regime                                                           | Density ( $Kg/m^3$ ) | Mass Capsule (g) | Mass Sample (g) |
| None                                                                    | 1185.23              | 0.041            | 0.023           |
| 150°C, 2hrs                                                             | 1185.23              | 0.041            | 0.0165          |
| 300°C, 2hrs                                                             | 1185.23              | 0.041            | 0.023           |

### Supplementary Table S3 - Measured magnetic field from each array of magnets tested in this experiment.

| No. Magnets                 | 0 | 1     | 2   | 3     | 4     | 5   | 6     |
|-----------------------------|---|-------|-----|-------|-------|-----|-------|
| Maximum Magnetic Field (mT) | 0 | 160   | 263 | 321   | 356   | 399 | 422   |
| Minimum Magnetic Field (mT) | 0 | 85    | 151 | 240   | 273   | 301 | 363   |
| Average Magnetic Field (mT) | 0 | 122.5 | 207 | 280.5 | 314.5 | 350 | 392.5 |

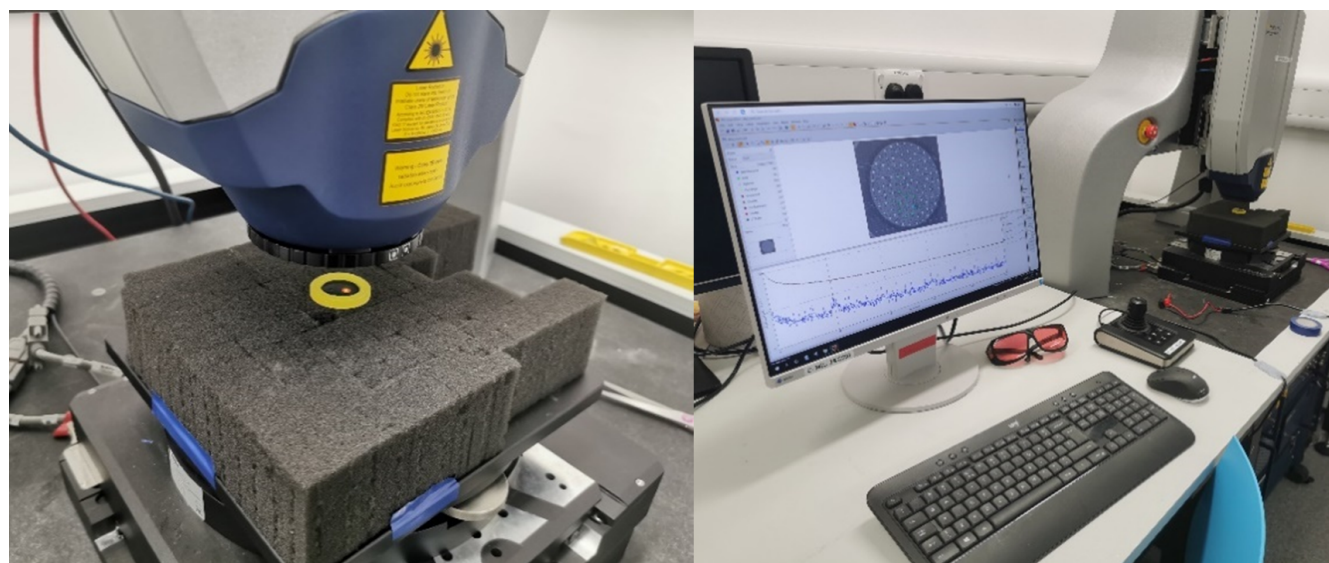

Supplementary Figure S1 - Clamped membrane undergoing measurements to capture the 1st resonant mode in Polytec's MSA-100-3D Micro System Analyzer.

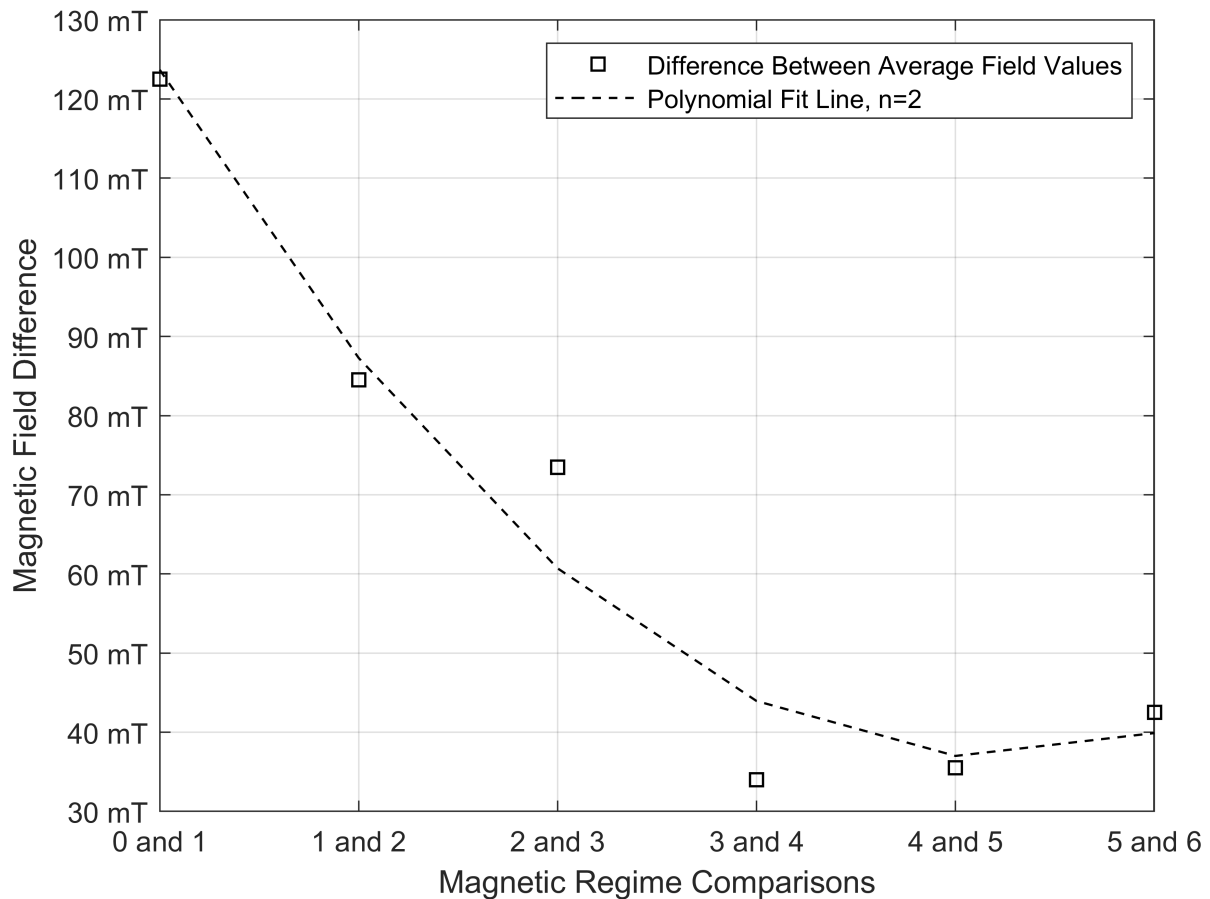

**Supplementary Figure S2 - Difference in magnetic field between each adjacent magnet stacking regime used experimentally. Regimes are detailed in Supplementary Table S3**

## References

1. Leissa, A. Membranes. In Braun, S. (ed.) *Encyclopedia of Vibration*, 762–770, DOI: <https://doi.org/10.1006/rwvb.2001.0132> (Elsevier, Oxford, 2001).
2. Daniel Macias, J., Ordonez-Miranda, J. & Alvarado-Gil, J. J. Resonance frequencies and Young’s modulus determination of magnetorheological elastomers using the photoacoustic technique. *J. Appl. Phys.* **112**, 124910, DOI: [10.1063/1.4770473](https://doi.org/10.1063/1.4770473) (2012). [https://pubs.aip.org/aip/jap/article-pdf/doi/10.1063/1.4770473/15103039/124910\\_1\\_online.pdf](https://pubs.aip.org/aip/jap/article-pdf/doi/10.1063/1.4770473/15103039/124910_1_online.pdf).
3. Jones, D. W. & Rizkalla, A. S. Characterization of experimental composite biomaterials. *J. Biomed. Mater. Res.* **33**, 89–100, DOI: [https://doi.org/10.1002/\(SICI\)1097-4636\(199622\)33:2<89::AID-JBM5>3.0.CO;2-H](https://doi.org/10.1002/(SICI)1097-4636(199622)33:2<89::AID-JBM5>3.0.CO;2-H) (1996).
4. Moraes, R. R. *et al.* Preparation and evaluation of dental resin luting agents with increasing content of bisphenol-a ethoxylated dimethacrylate. *J. Biomater. Appl.* **24**, 453–473, DOI: [10.1177/0885328208098594](https://doi.org/10.1177/0885328208098594) (2010).
5. Sideridou, I., Tserki, V. & Papanastasiou, G. Study of water sorption, solubility and modulus of elasticity of light-cured dimethacrylate-based dental resins. *Biomaterials* **24**, 655–665, DOI: [https://doi.org/10.1016/S0142-9612\(02\)00380-0](https://doi.org/10.1016/S0142-9612(02)00380-0) (2003).
6. Chung, S. M., Yap, A. U. J., Koh, W. K., Tsai, K. T. & Lim, C. T. Measurement of poisson’s ratio of dental composite restorative materials. *Biomaterials* **25**, 2455–2460, DOI: [10.1016/j.biomaterials.2003.09.029](https://doi.org/10.1016/j.biomaterials.2003.09.029) (2004).
7. N.A.S.A. Earth science data systems - “air mass/density” (2023). <https://www.earthdata.nasa.gov/topics/atmosphere/atmospheric-pressure/air-mass-density> [Accessed on (07/12/2023)].
8. Truax, B. Speed of sound (2023). [https://www.sfu.ca/sonic-studio-webdav/handbook/Speed\\_\\_Of\\_Sound.html](https://www.sfu.ca/sonic-studio-webdav/handbook/Speed__Of_Sound.html) [Accessed on (07/12/2023)].
9. Goldfarb, R. B. The permeability of vacuum and the revised international system of units. *IEEE Magn. Lett.* **8**, 1–3, DOI: [10.1109/LMAG.2017.2777782](https://doi.org/10.1109/LMAG.2017.2777782) (2017).
